# Supplementary material for: Incremental Health Care Burden of Treatment-Resistant Depression Among Commercial, Medicaid, and Medicare Payers
Source: Atypon-hosted journal article supplement (doi:10.1176/appi.ps.201900398), 2020-04-02
Supplement: appi.ps.201900398.ds001.pdf [file appi.ps.201900398.ds001.pdf]

**CONSORT diagram of study sample**

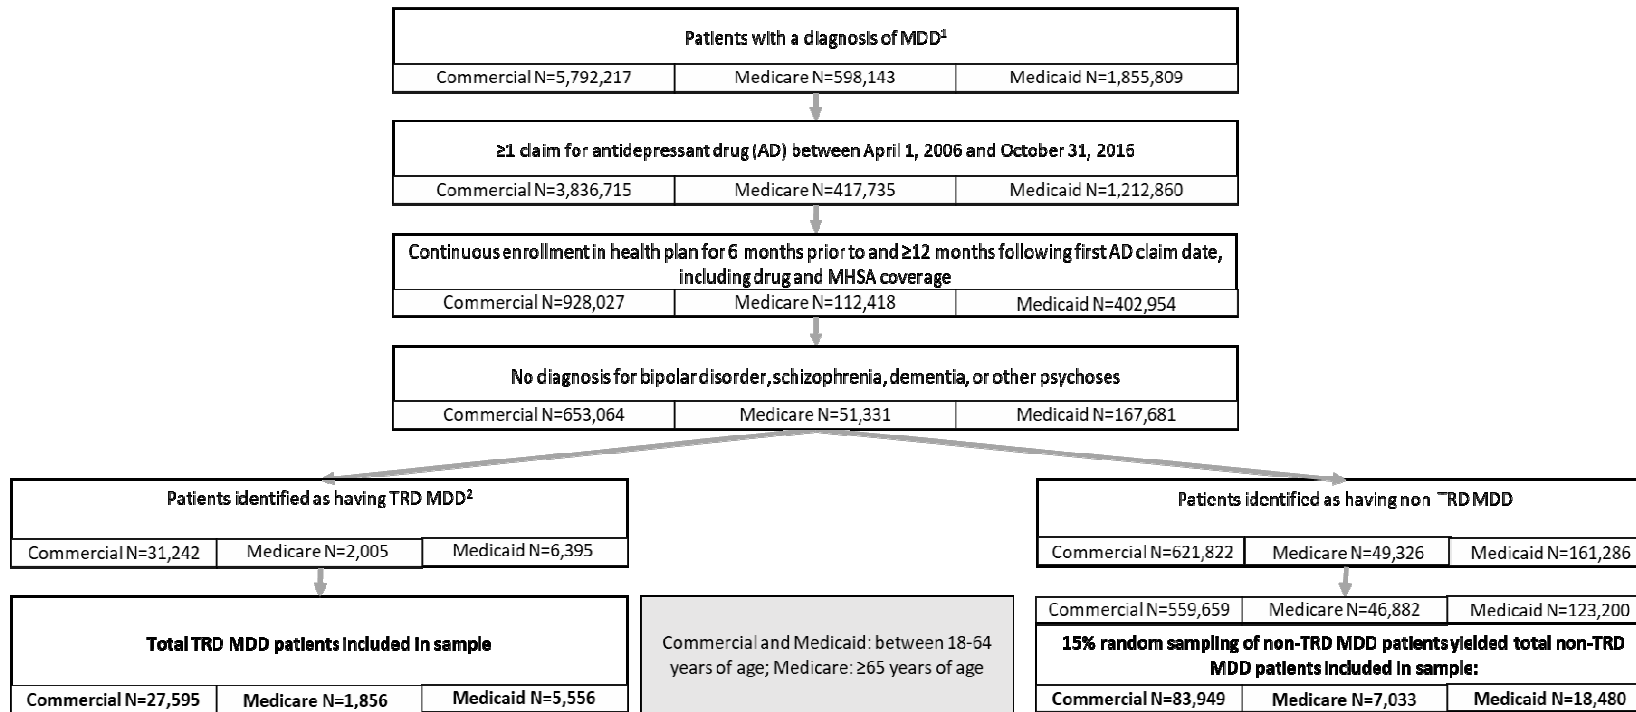

<sup>1</sup> MDD diagnosis codes: ICD-9-CM: 296.2x, 296.3x; ICD-10-CM: F32.x, F33.x

<sup>2</sup> Identification of TRD patients: ≥3 lines of therapy (LOT), ≥2 LOT with adequate dose and duration, subsequent unique LOT after 2 failed lines (i.e. TRD date), AND gap between each LOT prior to TRD date is <90 days; adequate duration: ≥6 weeks of treatment in each LOT with <14 day gap; adequate dose: ≥starting daily dose recommended by APA

## Incremental healthcare utilization of treatment-resistant depression in patients with major depressive disorder treated across national U.S. payers

### All Cause Healthcare Utilization

| Commercial      | OR/IRR | Lower | Upper |
|-----------------|--------|-------|-------|
| Hospitalization | 1.76   | 1.68  | 1.83  |
| ED              | 1.45   | 1.4   | 1.49  |
| Outpatient      | 1.54   | 1.52  | 1.55  |
| Medicaid        | OR/IRR | Lower | Upper |
| Hospitalization | 1.32   | 1.23  | 1.43  |
| ED              | 1.38   | 1.29  | 1.47  |
| Outpatient      | 1.39   | 1.35  | 1.42  |
| Medicare        | OR/IRR | Lower | Upper |
| Hospitalization | 1.55   | 1.38  | 1.74  |
| ED              | 1.44   | 1.29  | 1.6   |
| Outpatient      | 1.29   | 1.24  | 1.34  |

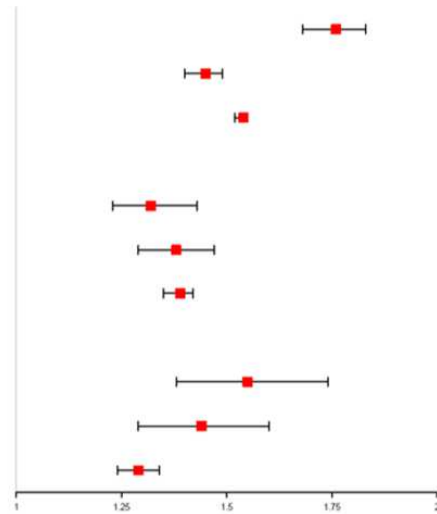

### Mental Health-Related Healthcare Utilization

| Commercial      | OR/IRR | Lower | Upper |
|-----------------|--------|-------|-------|
| Hospitalization | 2.22   | 2.11  | 2.35  |
| ED              | 1.85   | 1.76  | 1.94  |
| Outpatient      | 1.92   | 1.89  | 1.96  |
| Medicaid        | OR/IRR | Lower | Upper |
| Hospitalization | 1.46   | 1.34  | 1.59  |
| ED              | 1.49   | 1.39  | 1.59  |
| Outpatient      | 1.51   | 1.45  | 1.57  |
| Medicare        | OR/IRR | Lower | Upper |
| Hospitalization | 2.19   | 1.85  | 2.58  |
| ED              | 2.06   | 1.7   | 2.49  |
| Outpatient      | 1.86   | 1.72  | 2.02  |

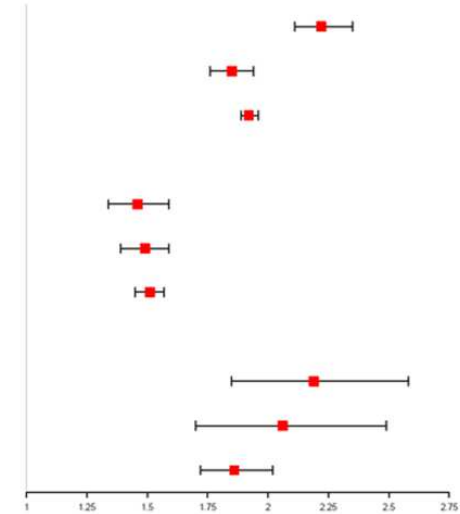

OR: odds ratio; IRR: incident rate ratio  
 Odds ratios are reported for hospitalizations and ED visits; Incident rate ratios are reports for outpatient visits

**Diagnosis codes for excluded comorbidities**

| <b>Condition</b> | <b>ICD-9 Code</b>                                                                          | <b>ICD-10 Code</b>                                                                                                         |
|------------------|--------------------------------------------------------------------------------------------|----------------------------------------------------------------------------------------------------------------------------|
| Bipolar disorder | 296.0x-296.9x (except 296.2x, 296.3x)                                                      | F30.x, F31.x, F34.8x, F34.9, F39                                                                                           |
| Schizophrenia    | 295.x                                                                                      | F20.x, F21, F23, F25.x                                                                                                     |
| Dementia         | 291.2, 291.1, 292.82, 290.40, 290.41, 290.42, 290.43, 294.10, 294.11, 290.x, 294.2, 294.21 | F01.x, F02.x, F03.x, F10.27, F10.97, F13.27, F13.97, F18.17, F18.27, F18.97, F19.17, F19.27, F19.97, G31.0, G31.09, G31.83 |
| Other Psychoses  | 298.x                                                                                      | F2.x                                                                                                                       |

**Additional baseline characteristics across payers, stratified by TRD status**

| Characteristics                               | Commercial        |       |                |       |                      | Medicaid          |       |               |       |                      | Medicare         |       |               |       |                      |
|-----------------------------------------------|-------------------|-------|----------------|-------|----------------------|-------------------|-------|---------------|-------|----------------------|------------------|-------|---------------|-------|----------------------|
|                                               | No TRD (n=83,949) |       | TRD (n=27,595) |       | P-Value <sup>1</sup> | No TRD (n=18,480) |       | TRD (n=5,556) |       | P-Value <sup>1</sup> | No TRD (n=7,033) |       | TRD (n=1,856) |       | P-Value <sup>1</sup> |
|                                               | N/Mean            | %     | N/Mean         | %     |                      | N/Mean            | %     | N/Mean        | %     |                      | N/Mean           | %     | N/Mean        | %     |                      |
| Pre-index MDD severity, n (%)                 |                   |       |                |       |                      |                   |       |               |       |                      |                  |       |               |       |                      |
| Mild/Remission                                | 1,654             | 1.97  | 447            | 1.62  | 0.000                | 307               | 1.66  | 63            | 1.13  | 0.005                | 84               | 1.19  | 31            | 1.67  | 0.107                |
| Moderate                                      | 6,347             | 7.56  | 1,954          | 7.08  | 0.008                | 1,276             | 6.90  | 445           | 8.01  | 0.005                | 288              | 4.09  | 84            | 4.53  | 0.410                |
| Severe                                        | 4,332             | 5.16  | 1,529          | 5.54  | 0.014                | 1,201             | 6.50  | 378           | 6.80  | 0.422                | 224              | 3.18  | 70            | 3.77  | 0.209                |
| Unspecified                                   | 4,504             | 5.37  | 1,161          | 4.21  | 0.000                | 988               | 5.35  | 184           | 3.31  | 0.000                | 358              | 5.09  | 76            | 4.09  | 0.077                |
| Unknown                                       | 67,112            | 79.94 | 22,504         | 81.55 | 0.000                | 14,708            | 79.59 | 4,486         | 80.74 | 0.060                | 6,079            | 86.44 | 1,595         | 85.94 | 0.579                |
| Baseline MH-related HRU, n (%)                |                   |       |                |       |                      |                   |       |               |       |                      |                  |       |               |       |                      |
| Number of MH-related hospitalizations ≥ 1     | 3,175             | 3.78  | 1,177          | 4.27  | 0.000                | 1,912             | 10.35 | 571           | 10.28 | 0.882                | 341              | 4.85  | 115           | 6.20  | 0.019                |
| Number of MH-related ED visits ≥ 1            | 3,177             | 3.78  | 1,169          | 4.24  | 0.001                | 3,357             | 18.17 | 1,024         | 18.43 | 0.654                | 208              | 2.96  | 62            | 3.34  | 0.392                |
| Number of MH-related outpatient non-ED visits |                   |       |                |       |                      |                   |       |               |       |                      |                  |       |               |       |                      |
| 0                                             | 49,230            | 58.64 | 15,468         | 56.05 | 0.000                | 8,906             | 48.19 | 2,504         | 45.07 | 0.000                | 5,034            | 71.58 | 1,268         | 68.32 | 0.006                |
| 1                                             | 14,412            | 17.17 | 4,615          | 16.72 | 0.089                | 3,658             | 19.79 | 1,065         | 19.17 | 0.303                | 995              | 14.15 | 255           | 13.74 | 0.653                |
| 2+                                            | 20,307            | 24.19 | 7,512          | 27.22 | 0.000                | 5,916             | 32.01 | 1,987         | 35.76 | 0.000                | 1,004            | 14.28 | 333           | 17.94 | 0.000                |
| Baseline all cause HRU, n (%)                 |                   |       |                |       |                      |                   |       |               |       |                      |                  |       |               |       |                      |
| Number of all cause hospitalizations ≥ 1      | 7,294             | 8.69  | 2,848          | 10.32 | 0.000                | 3,571             | 19.32 | 1,013         | 18.23 | 0.070                | 1,438            | 20.45 | 427           | 23.01 | 0.016                |
| Number of all cause ED visits ≥ 1             | 13,465            | 16.04 | 5,023          | 18.20 | 0.000                | 8,134             | 44.02 | 2,416         | 43.48 | 0.485                | 1,762            | 25.05 | 500           | 26.94 | 0.097                |
| Number of all cause outpatient non-ED visits  |                   |       |                |       |                      |                   |       |               |       |                      |                  |       |               |       |                      |
| 0                                             | 8,062             | 9.60  | 2,128          | 7.71  | 0.000                | 1,310             | 7.09  | 426           | 7.67  | 0.144                | 278              | 3.95  | 83            | 4.47  | 0.314                |
| 1                                             | 9,803             | 11.68 | 2,457          | 8.90  | 0.000                | 1,597             | 8.64  | 378           | 6.80  | 0.000                | 313              | 4.45  | 89            | 4.80  | 0.525                |
| 2                                             | 9,335             | 11.12 | 2,467          | 8.94  | 0.000                | 1,508             | 8.16  | 394           | 7.09  | 0.010                | 371              | 5.28  | 85            | 4.58  | 0.227                |
| 3+                                            | 56,749            | 67.60 | 20,543         | 74.44 | 0.000                | 14,065            | 76.11 | 4,358         | 78.44 | 0.000                | 6,071            | 86.32 | 1,599         | 86.15 | 0.851                |
| Baseline all cause HRU, mean±SD               |                   |       |                |       |                      |                   |       |               |       |                      |                  |       |               |       |                      |
| Total all cause hospitalizations              | 0.11±0.40         |       | 0.13±0.45      |       | 0.000                | 0.27±0.72         |       | 0.26±0.71     |       | 0.448                | 0.25±0.57        |       | 0.27±0.56     |       | 0.126                |
| Total all cause ED visits                     | 0.24±0.77         |       | 0.28±0.83      |       | 0.000                | 1.04±2.05         |       | 1.04±2.03     |       | 0.969                | 0.43±0.98        |       | 0.47±0.97     |       | 0.092                |
| Total all cause outpatient non-ED visits      | 7.02±8.23         |       | 8.76±9.70      |       | 0.000                | 10.38±16.63       |       | 11.04±16.38   |       | 0.009                | 13.00±13.11      |       | 14.33±13.75   |       | 0.000                |
| Baseline MH-related HRU                       |                   |       |                |       |                      |                   |       |               |       |                      |                  |       |               |       |                      |
| Total MH-related hospitalizations             | 0.04±0.23         |       | 0.05±0.25      |       | 0.000                | 0.13±0.47         |       | 0.13±0.47     |       | 0.933                | 0.05±0.24        |       | 0.07±0.28     |       | 0.016                |
| Total MH-related ED visits                    | 0.05±0.28         |       | 0.05±0.29      |       | 0.013                | 0.30±0.84         |       | 0.31±0.95     |       | 0.260                | 0.04±0.25        |       | 0.04±0.25     |       | 0.406                |
| Total MH-related outpatient non-ED visits     | 1.66±4.00         |       | 1.92±4.43      |       | 0.000                | 2.89±10.25        |       | 3.06±10.56    |       | 0.277                | 0.88±2.72        |       | 1.04±2.66     |       | 0.026                |

<sup>1</sup>P-values obtained from a regression of each baseline variable as an outcome of interest on a dummy for TRD status
